# Supplementary material
Source: PubMed Central journal article supplement (PMC8528470)
Supplement: mmc1.pdf [file mmc1.pdf]

# THE LANCET

## Respiratory Medicine

### Supplementary appendix

This appendix formed part of the original submission. We post it as supplied by the authors.

Supplement to: Tober-Lau P, Schwarz T, Vanshylla K, et al. Long-term immunogenicity of BNT162b2 vaccination in older people and younger health-care workers. *Lancet Respir Med* 2021; published online Oct 20. [http://dx.doi.org/10.1016/S2213-2600\(21\)00456-2](http://dx.doi.org/10.1016/S2213-2600(21)00456-2).

# Appendix

## Figure S1

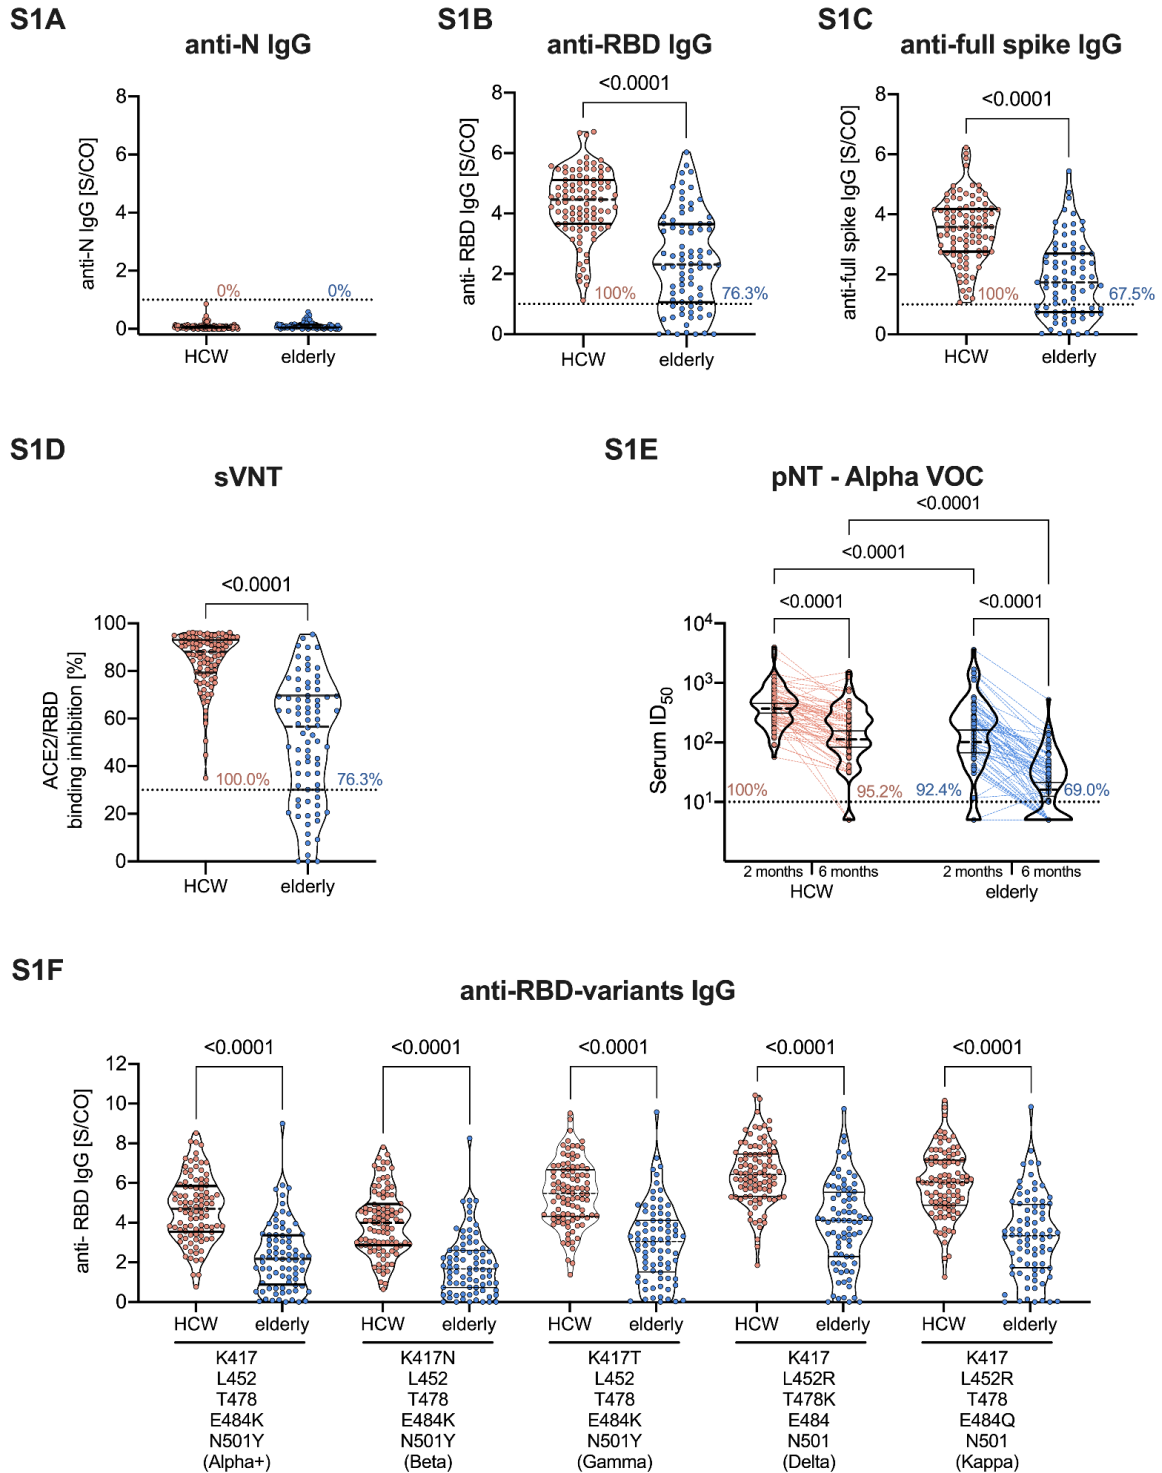

Tober-Lau, Schwarz, Vanshylla, Hillus et al. (2021), Long-term immunogenicity of BNT162b2 vaccination in the elderly and in younger health care workers

**Figure S1: Anti-SARS-CoV-2 nucleocapsid protein, RBD, and full spike IgG response at sixth-month follow-up in healthcare workers (HCW) and elderly persons vaccinated with BNT162b2.** Study participants were enrolled at Charité - Universitätsmedizin Berlin (HCW, n=107) and an assisted living facility in Berlin (elderly, n=82), Germany. Twelve participants with a history of infection with SARS-CoV-2 (10 HCW and 2 elderly) were excluded from the analysis. **(A)** Anti-SARS-CoV-2 N, **(B)** RBD- **(C)** and full-spike IgG measured in the serum of BNT162b2 vaccinated HCW and elderly persons at six-month follow-up, 5 months after completion of the two-dose regimen. **(D)** Neutralizing capacity was measured by sVNT and **(E)** serum neutralization against Alpha (B.1.1.7) VOC detected by pNT in vaccinated HCW and elderly persons at six-month follow-up. **(F)** Binding capacity of serum IgG against six different RBDs of SARS-CoV-2 variants carrying the indicated mutations in HCW and elderly, measured by ELISA. Dotted lines indicate the manufacturer's threshold values: for anti-N, anti-RBD, and anti-full spike IgG  $\geq 1$  S/Co, for sVNT  $>30\%$ , and the lower limit of detection (1:10 dilution) for pNT. Lines indicate the median and interquartile range except for pNT, where the geometric mean and 95% confidence interval are shown. P values were calculated by the non-parametric Mann Whitney *U* test or Kruskal-Wallis test with Dunn's multiple comparisons test. S/Co: signal-to-cutoff, N: nucleocapsid protein, RBD: receptor-binding domain, sVNT: surrogate virus neutralization test, ACE2: angiotensin-converting enzyme 2, ID<sub>50</sub>: 50% inhibition dilution.

# Appendix Table 1

|                                                                    | no infection |         |         |         | history of SARS-CoV-2 infection* |         |         |         |
|--------------------------------------------------------------------|--------------|---------|---------|---------|----------------------------------|---------|---------|---------|
|                                                                    | HCW          |         | Elderly |         | HCW                              |         | Elderly |         |
| Number of participants                                             | 97           |         | 80      |         | 10                               |         | 2       |         |
| Sex                                                                |              |         |         |         |                                  |         |         |         |
| Female (n, %)                                                      | 59           | 60.8%   | 59      | 73.8%   | 6                                | 60%     | 2       | 100%    |
| Male (n, %)                                                        | 38           | 39.2%   | 21      | 26.3%   | 4                                | 40%     | 0       | 0%      |
| Age                                                                |              |         |         |         |                                  |         |         |         |
| Included in analysis (n, %)                                        | 97           | 100%    | 80      | 100%    | 0                                | 0%      | 0       | 0%      |
| Dosing interval (days)                                             | 21           | 21-21   | 21      | 21-21   | 21                               | 21-21   | 21      | 21-21   |
| Sampling interval 2 months post 1 <sup>st</sup> vaccination (days) | 49           | 48-52   | 47      | 46-48   | 49                               | 48-58   | 46      | 46-46   |
| Sampling interval 6 months post 1 <sup>st</sup> vaccination (days) | 166          | 161-168 | 174     | 172-175 | 165                              | 161-169 | 174     | 174-174 |
| Comorbidities                                                      |              |         |         |         |                                  |         |         |         |
| Cardiovascular disease (n, %)                                      | 14           | 14,4%   | 64      | 80%     | 1                                | 10%     | 2       | 100%    |
| Type 2 diabetes (n, %)                                             | 3            | 3.1%    | 16      | 20%     | 0                                | 0%      | 1       | 50%     |
| Respiratory disease (n, %)                                         | 16           | 16.5%   | 17      | 21.3%   | 0                                | 0%      | 0       | 0%      |
| Active solid malignancy (n, %)                                     | 0            | 0%      | 5       | 6.3%    | 0                                | 0%      | 0       | 0%      |
| Active haematological malignancy (n, %)                            | 0            | 0%      | 4       | 5%      | 0                                | 0%      | 0       | 0%      |
| Immunodeficiency/-suppression (n, %)                               | 3            | 3.1%    | 5       | 6.3%    | 1                                | 10%     | 0       | 0%      |

**Characteristics of the elderly and healthcare workers (HCW) cohorts who completed six-month follow-up visits.** All data are presented as median (IQR), unless indicated otherwise. \*History of SARS-CoV-2 infection at baseline or before 2nd vaccination, determined by serology or PCR test. These patients were excluded from immunogenicity analysis.

Appendix Table 2

| time point        | test system                   | Proportion of positive outcome (95%CI) |                             |                       | Outcome values median [IQR]      |                                 |                      |
|-------------------|-------------------------------|----------------------------------------|-----------------------------|-----------------------|----------------------------------|---------------------------------|----------------------|
|                   |                               | HCW                                    | elderly                     | p value*              | HCW                              | elderly                         | p value <sup>#</sup> |
| 6-month follow-up | anti-S1 (S/CO)                | 97.9 (92.8-99.7)<br>[2/97]             | 60.0 (48.4-70.8)<br>[48/80] | <0.0001               | 3.2 (2.4-4.1)                    | 1.2 (0.5-2.2)                   | <0.0001              |
|                   | anti-RBD (S/CO)               | 100 (96.3-100)<br>[97/97]              | 76.3 (65.4-85.1)<br>[61/80] | <0.0001               | 4.5 (3.7-5.1)                    | 2.3 (1.1-3.6)                   | <0.0001              |
|                   | anti-spike full (S/CO)        | 100 (96.3-100)<br>[97/97]              | 67.5 (56.1-77.6)<br>[54/80] | <0.0001               | 3.6 (2.8-4.2)                    | 1.7 (0.7-2.7)                   | <0.0001              |
|                   | anti-N (S/CO)                 | 0.0 (0.0-3.7)<br>[0/97]                | 0.0 (0.0-4.5)<br>[0/80]     | -                     | 0.1 (0.0-0.1)                    | 0.1 (0.0-0.1)                   | -                    |
|                   | pNT delta (ID <sub>50</sub> ) | 95.2 (88.1-98.7)<br>[79/83]            | 60.6 (48.3-72.0)<br>[43/71] | <0.0001               | 72.7 (58.7-89.9) <sup>§</sup>    | 14.5 (11.5-18.2) <sup>§</sup>   | <0.0001 <sup>#</sup> |
|                   | pNT alpha (ID <sub>50</sub> ) | 95.2 (88.1-98.7)<br>[79/83]            | 69.0 (56.9-79.5)<br>[49/71] | <0.0001               | 134.4 (104.2-173.4) <sup>§</sup> | 20.2 (15.3-26.5) <sup>§</sup>   | <0.0001 <sup>#</sup> |
|                   | svNT (%)                      | 100 (96.3-100)<br>[97/97]              | 76.3 (65.4-85.1)<br>[61/80] | <0.0001               | 88.1 (79.3-93.1)                 | 56.6(30.1-59.6)                 | <0.0001              |
|                   | anti-RBD alpha+ (S/CO)        | -                                      | -                           | -                     | 4.7 (3.5-5.9)                    | 2.2 (0.9-3.4)                   | <0.0001              |
|                   | anti-RBD beta (S/CO)          | -                                      | -                           | -                     | 4.0 (2.9-4.9)                    | 1.7 (0.7-2.6)                   | <0.0001              |
|                   | anti-RBD gamma (S/CO)         | -                                      | -                           | -                     | 5.5 (4.3-6.7)                    | 3.1 (1.5-4.1)                   | <0.0001              |
|                   | anti-RBD delta (S/CO)         | -                                      | -                           | -                     | 6.4 (5.3-7.5)                    | 4.1 (2.3-5.5)                   | <0.0001              |
|                   | anti-RBD kappa (S/CO)         | -                                      | -                           | -                     | 6.0 (4.9-7.2)                    | 3.3 (1.7-4.9)                   | <0.0001              |
| IGRA (mIU/ml)     | -                             | -                                      | -                           | 1198.0 (593.9-2534.0) | 261.6 (141.5-828.6)              | <0.0001                         |                      |
| 2-month follow-up | pNT delta (ID <sub>50</sub> ) | 100 (94.7-100)<br>[69/69]              | 90.9 (81.3-96.6)<br>[60/66] | 0.0121                | 382.1 (308.5-473.3) <sup>§</sup> | 90.6 (63.9-128.2) <sup>§</sup>  | <0.0001 <sup>#</sup> |
|                   | pNT alpha (ID <sub>50</sub> ) | 100 (94.9-100)<br>[70/70]              | 95.2 (88.1-98.7)<br>[61/66] | 0.0248                | 390.7 (323.7-471.5) <sup>§</sup> | 135.0 (93.9-194.1) <sup>§</sup> | <0.0001 <sup>#</sup> |

**Proportion of positive outcome and outcome values in the different test systems.** S/CO: signal-to-cutoff ratio, S1: spike subdomain 1, RBD: receptor-binding domain, N: nucleocapsid protein, pNT: pseudovirus neutralization assay, IC<sub>50</sub>: 50% inhibitory dilution, ACE2: angiotensin-converting enzyme 2, IGRA: interferon-gamma release assay, IU: international units

\* p-value was calculated by Fisher's exact test

# p-value was calculated by the nonparametric Mann Whitney U test

§ geometric mean and 95%CI are shown

≠ p-value was calculated by the nonparametric Kruskal-Wallis test with Dunn's multiple comparisons test

## Appendix Table 3

|           | <b>HCW</b>          | <b>elderly</b>     | <b>p value</b> |
|-----------|---------------------|--------------------|----------------|
| pNT delta | 239.2 (143.4-347.8) | 58.3 (25.2-154.5)  | <0.0001        |
| pNT alpha | 323.7 (174.2-463.5) | 103.8 (37.8-191.4) | <0.0001        |

**Change in neutralization activity against SARS-CoV-2 delta and alpha based on area under the curve (AUC) calculations.** p-value was calculated by the nonparametric Mann Whitney U test.

## EICOV/COVIM Study group

Elisa T. Helbig; Lena J. Lippert; Charlotte Thibeault; Janine Michel; Friederike Münn; Patricia Tscheak; Marie Luisa Schmidt; Johanna Riege; Leon Bergfeld; Lara Maria Jeworowski; Claudia Conrad; Stefanie Jentzsch; Chantip Dang-Heine; Rudolf Tauber; Sebastian Kühn; Sevda Senaydin; Mira Risham; Sein Schmidt; Maria Rönnefarth; Christof von Kalle; Alexander Krannich; Piotr Kopankiewicz; Harald Bias; Denise Treue; Dana Briesemeister; Jenny Schlesinger; Andreas Hetey; Michelle Lisy; Luisa Kegel; Annelie Richter; Ben Al-Rim; Birgit Maeß; Kerstin Behn; Saskia Zvorc; Isabelle Schellenberger; Christina Pley; Georg Schwanitz; André Solarek, Viktoria Schenkel; Norma Bethke; Claudia Hülso; Sebastian Dieckmann; Christian Peiser; Doris Frey; Julie-Anne Gabelich; Ute Gläser; Sarah Steinbrecher; Lara Bardtke; Anna Hiller; Sophia Brumhard; Kai Pohl; Daniel Wendisch; Philipp Georg; Anne-Sophie Sinnigen; Carolin Rubisch; Lisbeth Hasler; Angela Sanchez Rezza; Pedro de Macedo Gomes; Paolo Kroneberg; Alexandra Horn; Willi Koch; Paula Stubbemann

## Supplementary Note

In this prospective cohort study, we investigated the durability of serological responses to COVID-19 mRNA vaccine BNT162b2 in a cohort of elderly persons and compared them to young HCW. We observed markedly reduced serum IgG responses to SARS-CoV-2 Spike and RBD, reduced sVNT titers, and reduced neutralizing titers against the Alpha and Delta VOCs, as measured by pNT (**Fig. 1, Appendix Fig. 1**). In addition, we assessed spike-specific T cells by Interferon gamma release assay (IGRA) and found a markedly reduced response in the elderly compared to HCW (**Fig. 1C**). However, memory B cells as well as memory T cells may be present despite reduced antibody levels,<sup>5</sup> and these were not investigated in this study. Circulating antigen-specific memory B cells are rare, their detection is technically challenging and the measurements are therefore usually restricted to smaller exploratory studies. The durability of vaccine-induced memory B cell and T cell responses in the elderly needs to be investigated in detail. Epidemiological evidence of waning protection, particularly in the elderly<sup>6</sup>, may suggest insufficient immune memory to the two-dose vaccine regimen in this population.<sup>5</sup> The occurrence of Delta VOC has clearly contributed to increased rates of breakthrough infections.<sup>7</sup> However, there is clear epidemiological evidence demonstrating an increase of breakthrough infection rates with the time elapsed since vaccination<sup>6,8,9</sup>, indicating that both the occurrence of Delta VOC, and time-dependent waning of immunity contribute to declining vaccine effectiveness. Our study complements the observation of time-dependent waning of protection, particularly in the elderly, supporting additional booster vaccinations for this risk population.



# Methods

## Study participants

Study participants were recruited in the EICOV, COVIMMUNIZE, and COVIM studies, three prospective cohort studies conducted under the auspices of Charité - Universitätsmedizin Berlin, Germany, in accordance with the Declaration of Helsinki and Good Clinical Practice.<sup>1,2</sup> EICOV and COVIMMUNIZE studies were approved by the local ethics committee of Charité - Universitätsmedizin Berlin (EA4/244/20, EA4/245/20), and COVIM was approved by the Federal Institute for Vaccines and Biomedicines (Paul Ehrlich Institute) and by the ethics committee of the state of Berlin (EudraCT-2021-001512-28). Written informed consent was obtained by all participants, according to local and national regulations.

HCW were recruited at Charité - Universitätsmedizin Berlin hospital, Berlin, Germany. Participants were eligible for inclusion if they were a) >18 years of age, b) employed at Charité - Universitätsmedizin Berlin, and c) received 2 doses of COVID-19 vaccine BNT162b2. Elderly cohort study participants were enrolled at an assisted-living facility in Berlin, Germany. Participants were eligible for inclusion if they were >70 years of age. All participants were largely self-sustained, and there were no cases of dementia or bedridden participants.

Blood sampling was conducted before 1st vaccination, 4±1 weeks after the 1st and 2nd vaccinations, respectively, and 6±1 months after the 1st vaccination. SARS-CoV-2 reverse transcription PCR (RT-PCR) of oropharyngeal swabs were performed during study visits in order to detect concomitant infections. Study participants were eligible for analysis of immunogenicity if they had completed a course of two vaccinations with BNT162b2 and the first dose was administered at least 22 weeks before the 6-month visit.

Ten HCW and two elderly participants were excluded from the analysis due to pre-existing anti-SARS-CoV-2 spike or nucleocapsid antibodies before 1st vaccination (n=6) or presence of anti-nucleocapsid antibodies 4±1 weeks after the 1st and before the 2nd vaccination (n=2). Additionally, 4 HCW presented with PCR-confirmed SARS-CoV-2 infection before 2nd vaccination. In the remaining 97 HCW and 80 elderly participants, no evidence of a SARS-CoV-2 infection was detected by PCR or antibody tests during the observation period.

## Antibody assessment and Interferon- $\gamma$ Release of SARS-CoV-2-Specific T Cells

Blood samples were tested for anti-SARS-CoV-2 antibodies, neutralizing capacity, and T cell reactivity as previously described.<sup>2</sup> In brief, SARS-CoV-2 specific antibodies were quantified using the commercially available SeraSpot® Anti-SARS-CoV-2 IgG microarray-based immunoassay including nucleocapsid and spike as antigens (Seramun Diagnostica GmbH, <https://www.seramun.com>), allowing for differentiation between infection and vaccine-induced immune responses. Functional neutralization capacity was investigated using a commercially available ELISA-based SARS-CoV-2 RBD-ACE2 binding inhibition assay (surrogate SARS-CoV-2 neutralization test (sVNT) cPass (medac GmbH, <https://international.medac.de>). A lentivirus-based SARS-CoV-2 pseudovirus neutralization assay (pNT) was employed to determine serum 50% inhibitory dilutions (ID<sub>50</sub>) against Alpha (B.1.1.7) and Delta (B.1.617.2) variants of concern.<sup>3</sup> SARS-CoV-2 specific T cell responses were measured by an interferon- $\gamma$  release assay (IGRA) of S1 stimulated T cells in whole blood using a commercially available kit (EUROIMMUN AG, <https://www.euroimmun.de>). SARS-CoV-2 RBD variants antibody testing was performed using RBD proteins (provided by InVivo BioTech Services GmbH, Hennigsdorf, Germany). Different RBD proteins were printed in an array format in a similar

manner as done for the screening SeraSpot® Anti-SARS-CoV-2 IgG microarray (Seramun Diagnostica GmbH, <https://www.seramun.com>) and tested the same way.

### Statistical analysis

Statistical analysis was done by GraphPad PRISM, version 9.1.2, or JMP Pro, version 15.2.0. Group comparisons were analyzed in a univariate analysis utilizing Fisher's exact test, nonparametric Mann Whitney U test or nonparametric Kruskal-Wallis test with Dunn's multiple comparisons test. 95% CIs were calculated according to Clopper and Pearson.<sup>4</sup> Unless otherwise specified, values are given as medians with interquartile ranges [IQR]. For IC50 in pNT geometric mean and 95%CI are depicted. Reduction of neutralizing antibodies against delta and alpha VOC between follow-up 2 and 6 were measured by the area under the curve (AUC). P-values below 0.05 were considered significant.

## Supplementary References

- 1 Schwarz T, Tober-Lau P, Hillus D, *et al.* Delayed Antibody and T-Cell Response to BNT162b2 Vaccination in the Elderly, Germany. *Emerg Infect Dis* 2021; **27**. DOI:10.3201/eid2708.211145.
- 2 Hillus D, Schwarz T, Tober-Lau P, *et al.* Safety, reactogenicity, and immunogenicity of homologous and heterologous prime-boost immunisation with ChAdOx1 nCoV-19 and BNT162b2: a prospective cohort study. *Lancet* 2021; published online Aug 12. DOI:10.1016/S2213-2600(21)00357-X.
- 3 Vanshylla K, Di Cristanziano V, Kleipass F, *et al.* Kinetics and correlates of the neutralizing antibody response to SARS-CoV-2 infection in humans. *Cell Host Microbe* 2021; **29**: 917–29.e4.
- 4 Clopper CJ, Pearson ES. THE USE OF CONFIDENCE OR FIDUCIAL LIMITS ILLUSTRATED IN THE CASE OF THE BINOMIAL. *Biometrika* 1934; **26**: 404–13.
- 5 Sette A, Crotty S. Adaptive immunity to SARS-CoV-2 and COVID-19. *Cell* 2021; **184**: 861–80.
- 6 Mizrahi B, Lotan R, Kalkstein N, *et al.* Correlation of SARS-CoV-2 breakthrough infections to time-from-vaccine; Preliminary study. *bioRxiv*. 2021; published online July 31. DOI:10.1101/2021.07.29.21261317.
- 7 Planas D, Veyer D, Baidaliuk A, *et al.* Reduced sensitivity of SARS-CoV-2 variant Delta to antibody neutralization. *Nature* 2021; published online July 8. DOI:10.1038/s41586-021-03777-9.
- 8 Pouwels KB, Pritchard E, Matthews P, *et al.* Impact of Delta on viral burden and vaccine effectiveness against new SARS-CoV-2 infections in the UK. *medRxiv*. 2021; published online Aug 24. DOI:10.1101/2021.08.18.21262237.
- 9 Goldberg Y, Mandel M, Bar-On YM, *et al.* Waning immunity of the BNT162b2 vaccine: A nationwide study from Israel. *bioRxiv*. 2021; published online Aug 30. DOI:10.1101/2021.08.24.21262423.
